# Supplementary material for: Redox-coupled proton pumping drives carbon concentration in the photosynthetic complex I
Source: PubMed Central journal article supplement (PMC6981117; doi:10.1038/s41467-020-14347-4), 2020-01-24
Supplement: 41467_2020_14347_MOESM1_ESM.pdf [file 41467_2020_14347_MOESM1_ESM.pdf]

## Supplementary Information

### Supplementary Methods

**Construction of the *T. elongatus* mutant.** The generation of the CupS-TwinStrep-tag (TS) mutant was based on a CupS-StrepII-tag plasmid that was created by PCR amplification of the *cupS* (*tll0220*) gene and the corresponding upstream region using genomic DNA of *Thermosynechococcus elongatus* as template. Thereby at the 3'-end the StrepII-tag coding sequence as well as a SacII restriction site and at the 5'-end a SacI restriction site were fused by primer extensions (primers: P1-*for*-5'-AAAGAGCTCGGCCATAGCCAGATGTC-3'; P2-*rev*-5'-GGGCCGCGTATTATTTTCGAACTGCGGGTGG CTCCAAGCGCTGACTTTGTAGGGAATGTTG-3'). The product was ligated into a HincII linearized pUC18 plasmid. The *cupS* downstream region was amplified by use of PCR primers fusing a 5' PstI and 3' KpnI site (primers: P3-*for*-5'-GGGCTGCAGGGTATTAGCAGATTTCCC-3'; P4-*rev*-5'-CCCGGTACCCAATCAGGTCGTAGTTGC-3') and afterwards cloned into the plasmid pBluescriptSK(+) $Km^R$ . The kanamycin resistance cassette and the *cupS* downstream region were then ligated via the restriction sites SacII and KpnI into the pUC18 plasmid containing the *cupS* upstream region (see above) resulting in pCupS-StrepII-tag construct. To generate the CupS-TS-tag mutant, *cupS* (*tll0220*) and the corresponding upstream region were amplified by PCR from pCupS-StrepII-tag, and thereby extended by half the sequence of the TS-tag at the 3'-end (primers: P1; P5-*rev*-5'-GCAGAACACCAGAACCACCGCCGCTGCCGCGCCTTTTTTCGAACTGCGGGTGGC-3'). The product was used as a template for a second PCR and thus extended with the other half of the TS-tag with the addition of the restriction site NotI to the 3'-end (primers: P1; P6-*rev*-5'-CCCGCGCCGCTTACTTCTCAAAT TGCGGATGAGACCACGCAGAACCACCAGAACCACC-3'). Finally, the StrepII-tag was replaced with the TS-tag via the restriction sites NheI and NotI. The resulting plasmid was transformed into *T. elongatus* according to Ref.<sup>1</sup> Full segregation of the mutant allele was confirmed by PCR (primers: P7-*for*-5'-GGATTAACGGACGCGATTAC-3'; P8-*rev*-5'-AGGCCGATAAGGCAGAACTA-3'). See Supplementary Table 4 for list of primers. The original strain of *Thermosynechococcus elongatus* BP1 originates from Ref. 2.

**Culture conditions: *T. elongatus*.** The CupS-TS-tag mutant was grown in BG-11 liquid medium<sup>3</sup> with the addition of 80  $\mu\text{g ml}^{-1}$  of kanamycin, at a temperature of 45°C, and under illumination of increasing intensity of 50-200  $\mu\text{mol photons}$  (dependent on cell density). The cells were bubbled with 5% CO<sub>2</sub> until an optical density (OD<sub>680</sub>) of 1.5 was reached, and then incubated only with compressed air to start the expression of NDH-1MS complex.

**Purification of NDH-1MS complex.** NDH-1MS was isolated from *T. elongatus* via TwinStrep(TS)/Streptactin affinity chromatography (IBA LifeSciences) with the TwinStrep-tag fused to the C-terminus of CupS (see above). The solubilisation of the thylakoid membranes and the purification of the complex were described earlier in detail.<sup>4,5</sup> Within this study, minor modifications were introduced. In brief, thylakoid membranes were prepared according to Ref.<sup>6</sup> and solubilised with 1% (w/v) glycol-diosgenin (GDN, Anatrace) and buffers for equilibration and elution were prepared with 0.02% (w/v) GDN. Strep-tagged protein complexes were concentrated with a spin concentrator (100 kDa cut off) and stored at -80°C until further analysis. For cryo-EM grid preparation, the sample was polished using size-exclusion chromatography.

**Zinc quantification.** Zinc quantification was performed by inductively-coupled plasma optical emission spectrometry (ICP-OES) according to Ref. 6. In brief, the dried samples were dissolved in 1 ml 65% (w/w) HNO<sub>3</sub> at RT overnight, incubated at 60°C, 80°C and 100°C for 1 hr each and cooled down to 50°C before addition of 0.2 ml of 30% (v/v) H<sub>2</sub>O<sub>2</sub>. Then, the sample was heated again to 60°C and 100°C for 30 min each, cooled down to RT and ultrapure water was added to a final volume of 6 ml. The samples were analysed by ICP-OES with an iCAPDuo 6500 instrument (Thermo Fisher Scientific, Dreieich, Germany) after calibration with a multi-element standard. Emission specific for zinc was measured at 2025 nm, 2062 nm and 2138 nm.

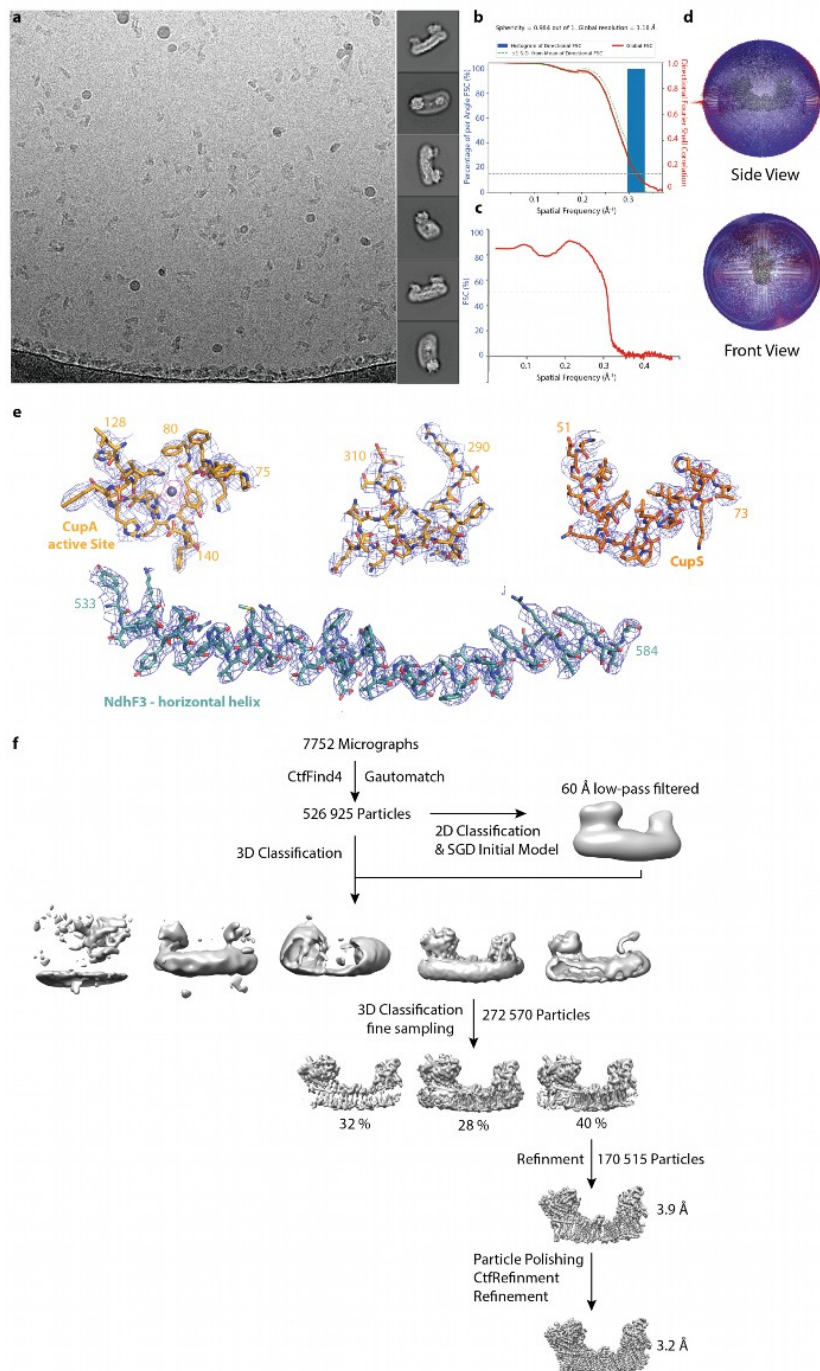

**Supplementary Fig. 1 | Cryo-EM data collection, analysis, and classification scheme.** **a)** Representative cryo-EM micrograph collected with an FEI Titan Krios microscope, operated at 300 kV and equipped with a K2 Summit camera. Representative reference-free 2D class averages are shown. **b)** 3DFSC (<https://3dfsc.salk.edu>) and preferred orientation analysis of the dataset with the red line, representing the estimated global FSC of  $3.18 \text{ \AA} \pm 1 \text{ SD}$  (green dashed lines). A sphericity of 0.984 indicates an isotropic map. **c)** Model vs. map FSC for the final PHENIX real-space refined model. **d)** Angular distribution of the particles used for the final round of refinement. **e)** Representative regions of the photosynthetic complex I (in stick representation, same colours as in Fig. 1) and surrounding electron density maps are shown. Maps are displayed as a mesh using a contour level of up to  $2 \text{ \AA}$  around the atoms. Subunits and residue numbers are specified. **f)** The 526,925 particles selected from the dataset were 3D classified into five classes using as a reference an *ab initio* model generated by the SGD algorithm in RELION. A single class was selected and further sub-classified into three classes. The class consisting of the best aligning particles was subsequently auto-refined in RELION. After Bayesian particle polishing and CTF refinement, the particles were subjected to a final round of 3D refinement in RELION.

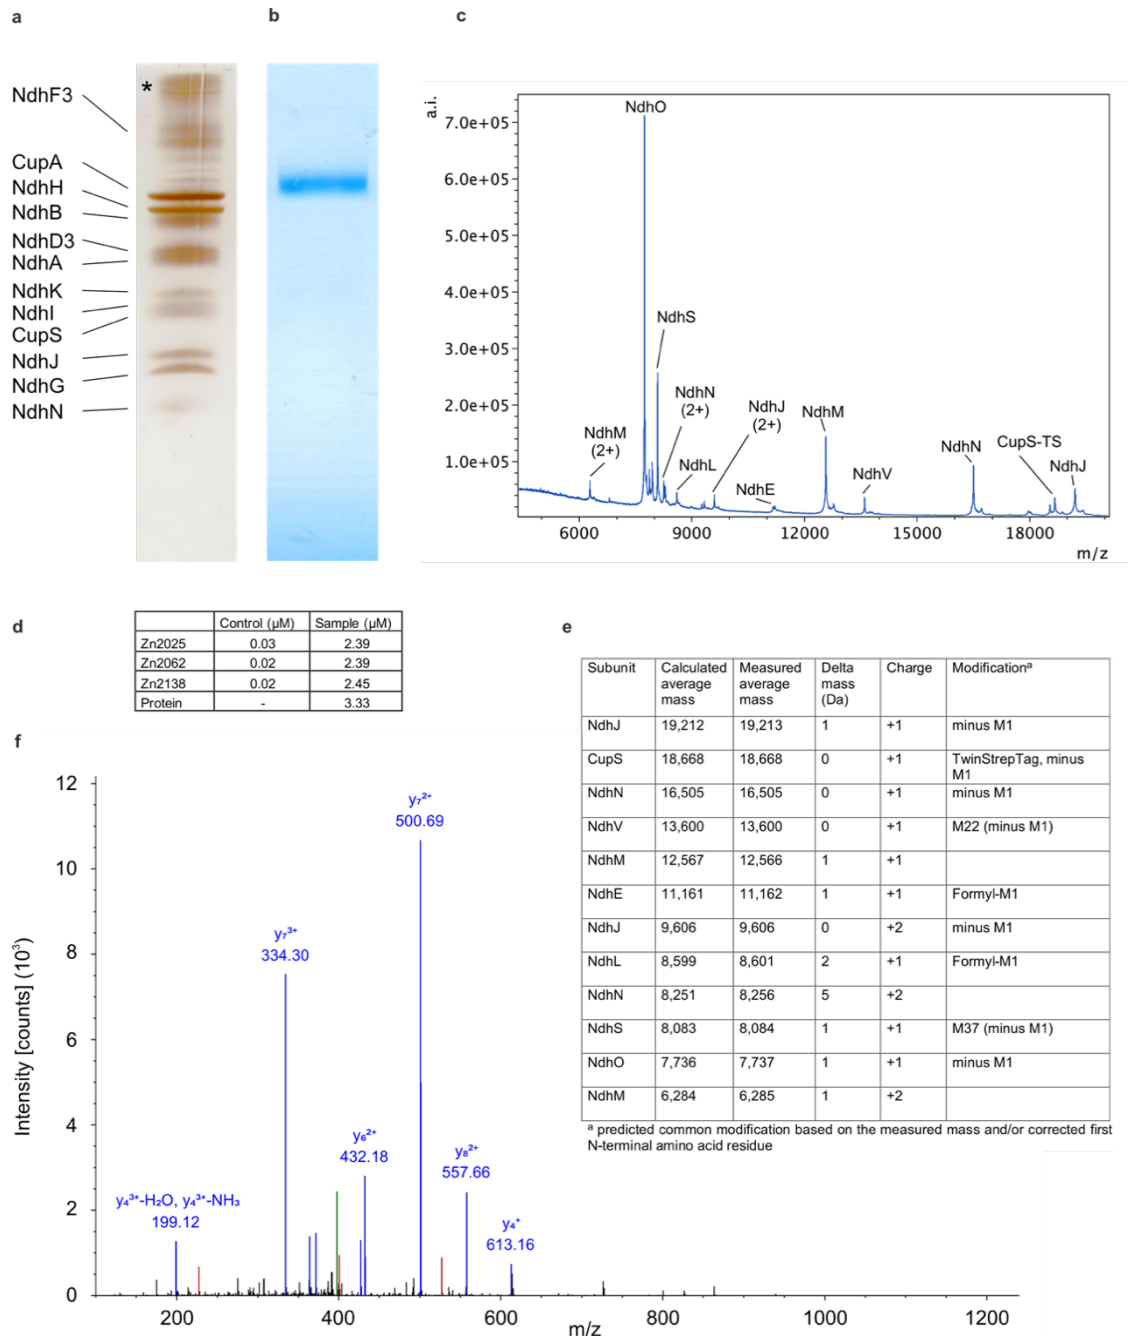

**Supplementary Fig. 2 | Subunit composition and mass spectrometry analysis of NDH-1MS from *T. elongatus*.** **a)** The purified NDH-1MS complex was analysed by SDS-PAGE (\*probable protein aggregates), **b)** Blue-native PAGE, and **c/e)** MALDI-ToF mass spectrometry as described in Ref.<sup>5</sup> (NdhJ, NdhM and NdhN are present as single and double charged (2+) ions) **d)** Zinc quantification by Inductively-Coupled Plasma Optical Emission Spectrometry (ICP-OES) according to Ref.<sup>6</sup> Zinc was detected at three specific wavelengths (2025 nm, 2062 nm and 2138 nm) and quantified in control (buffer only) and NDH-1MS sample after calibration with a zinc standard. Comparison with the protein concentration indicates a protein-to-zinc ratio of ~0.7. **f)** The CupA protein band (see panel **a**) was digested by trypsin and analysed by tandem mass spectrometry as described in Ref.<sup>5</sup> Citrullination of arginine as well as oxidation of methionine and cysteine were allowed as dynamic modifications and only peptides that were identified with high confidence (false discovery rate >0.01) were considered as positive results. The peptide LLHHLWHDR<sub>135</sub> was the most abundant peptide (40 peptide spectrum matches vs. 1-23 PSMs) in the analysis and we have no indication for citrullination of Arg135.

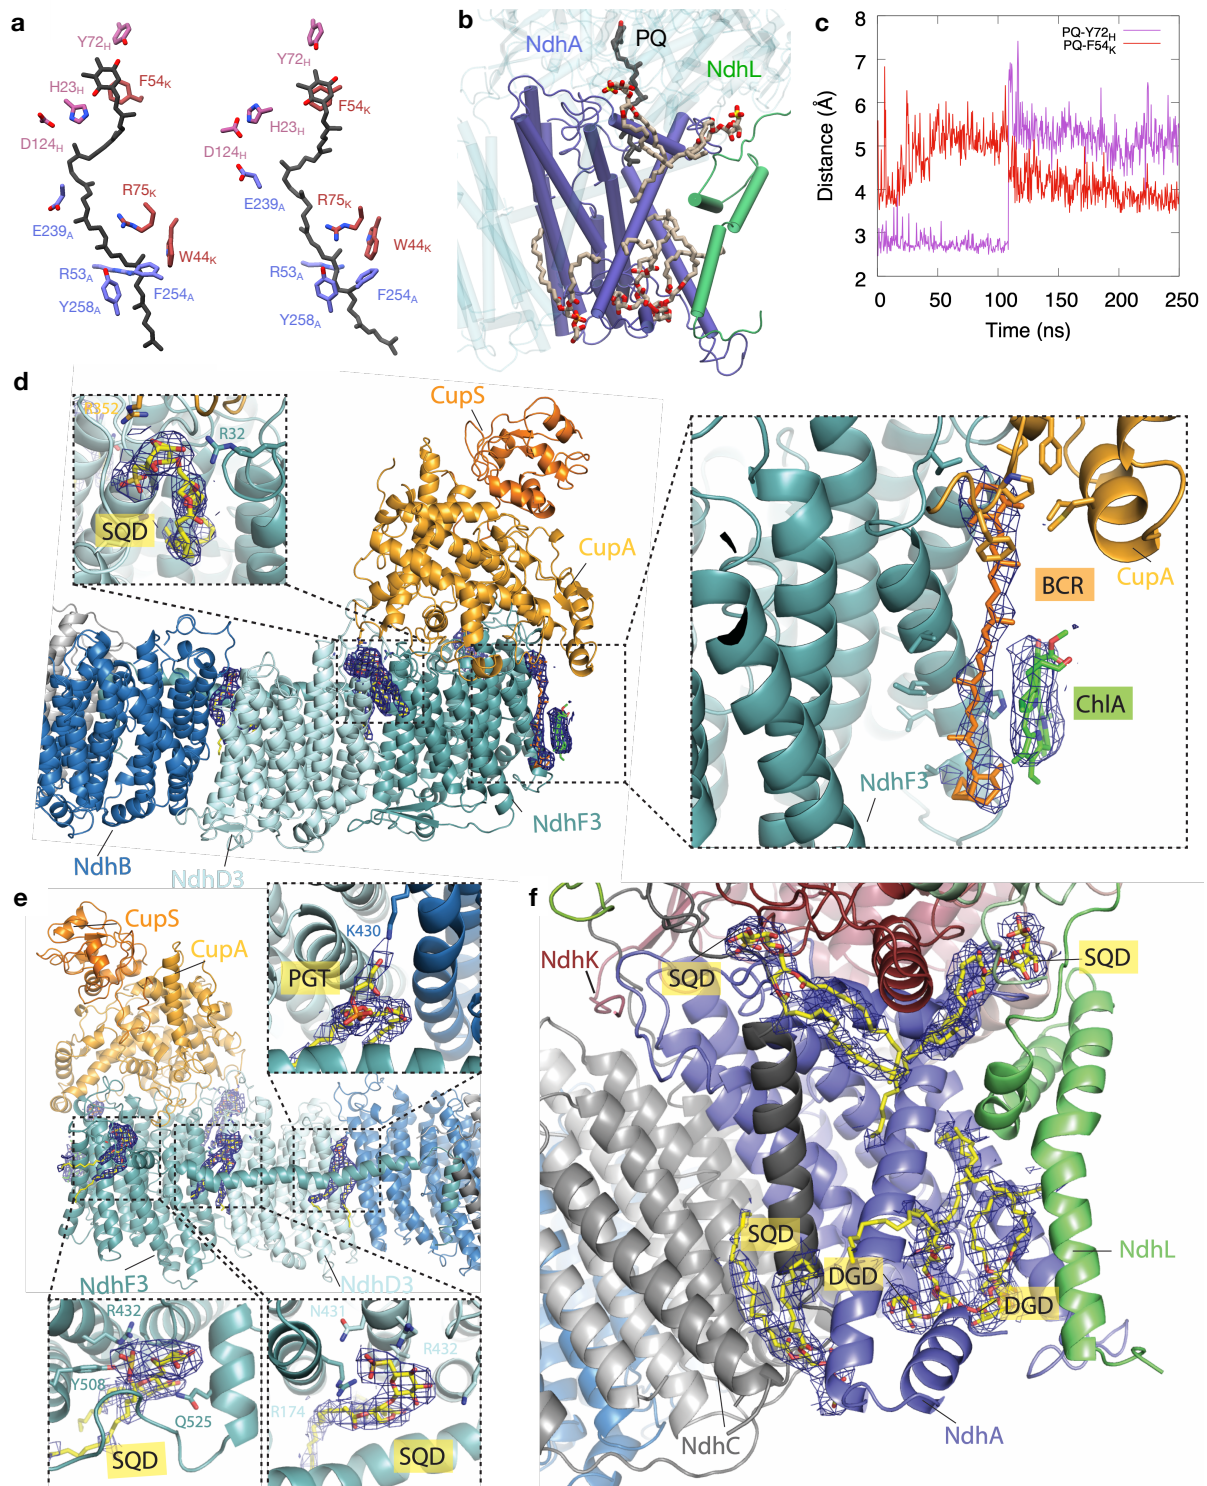

**Supplementary Fig. 3 | Non-protein cofactors and lipids in the photosynthetic complex I.** **a**) PQ binding site obtained from MD simulations. PQ in hydrogen-bond interaction with Tyr72 of NdhH subunit (*left*) and in stacking contact with Phe54 of NdhK (*right*). The figures show conserved residues of NdhH, NdhK and NdhA along the PQ-binding cavity. **b**) The PQ-cavity entrance is located in the NdhA subunit at the interface of three  $\alpha$ -helices, in the proximity of NdhL (in green), and surrounded by experimentally observed lipid molecules. **c**) Distance of the PQ-headgroup to Tyr72 of NdhH and Phe54 of NdhK during 250 ns MD simulations. **d, e**) Experimentally resolved non-protein cofactors at the NdhF3/CupA interface from **e**) the front and **d**) backview. The binding area for the Chl *a*/ $\beta$ -carotene (ChlA/BCR) motif is magnified. All densities are shown at 3 sigma value and using a contour level of up to 2 Å around the atoms. **f**) Lipid binding next to the PQ entry site. SQD – sulfoquinovosyl diglyceride; DGD - digalactosyl diacylglycerol; PGT – phosphatidylglycerol.

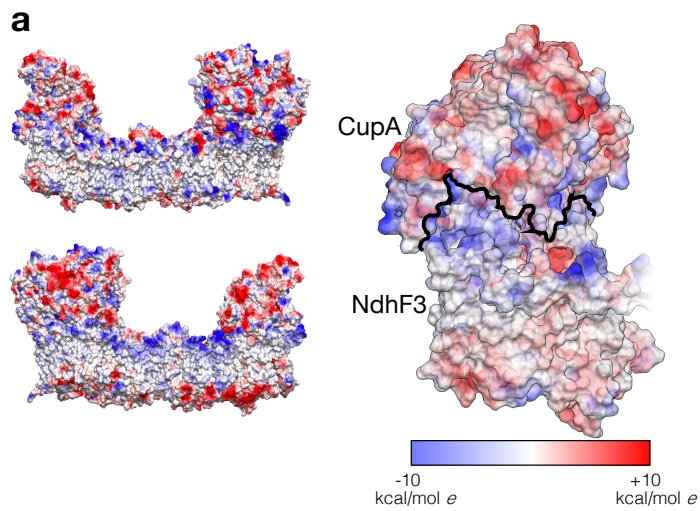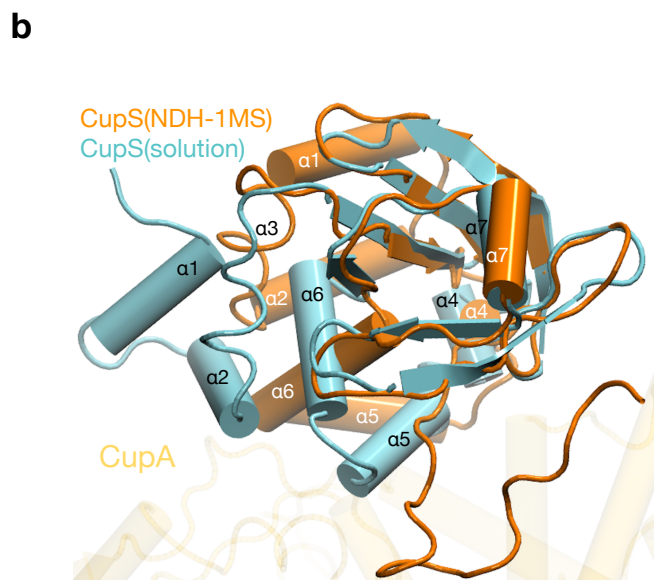

**Supplementary Fig. 4 | CupA structure and interactions.** **a**) Electrostatic potential (in kcal/mol *e*) at the surface of the complete NDH-1MS (left) and closeup of the CupA/NdhF3 interface (right). The negative area at the bottom of CupA (red) electrostatically interacts with the positive area (blue) at the top of NdhF3 (CupA-NdhF3 contact shown by a thick black line). **b**) CupS undergoes conformational changes from its solution structure (CupS in cyan, PDB ID: 2MXA<sup>9</sup>) upon binding to CupA (CupS in orange). The figure shows how helices  $\alpha 1$ ,  $\alpha 2$ , and  $\alpha 3$  in the N-terminal region, and  $\alpha 5$  and  $\alpha 6$  in the middle region, close upon the  $\beta$ -sheet.

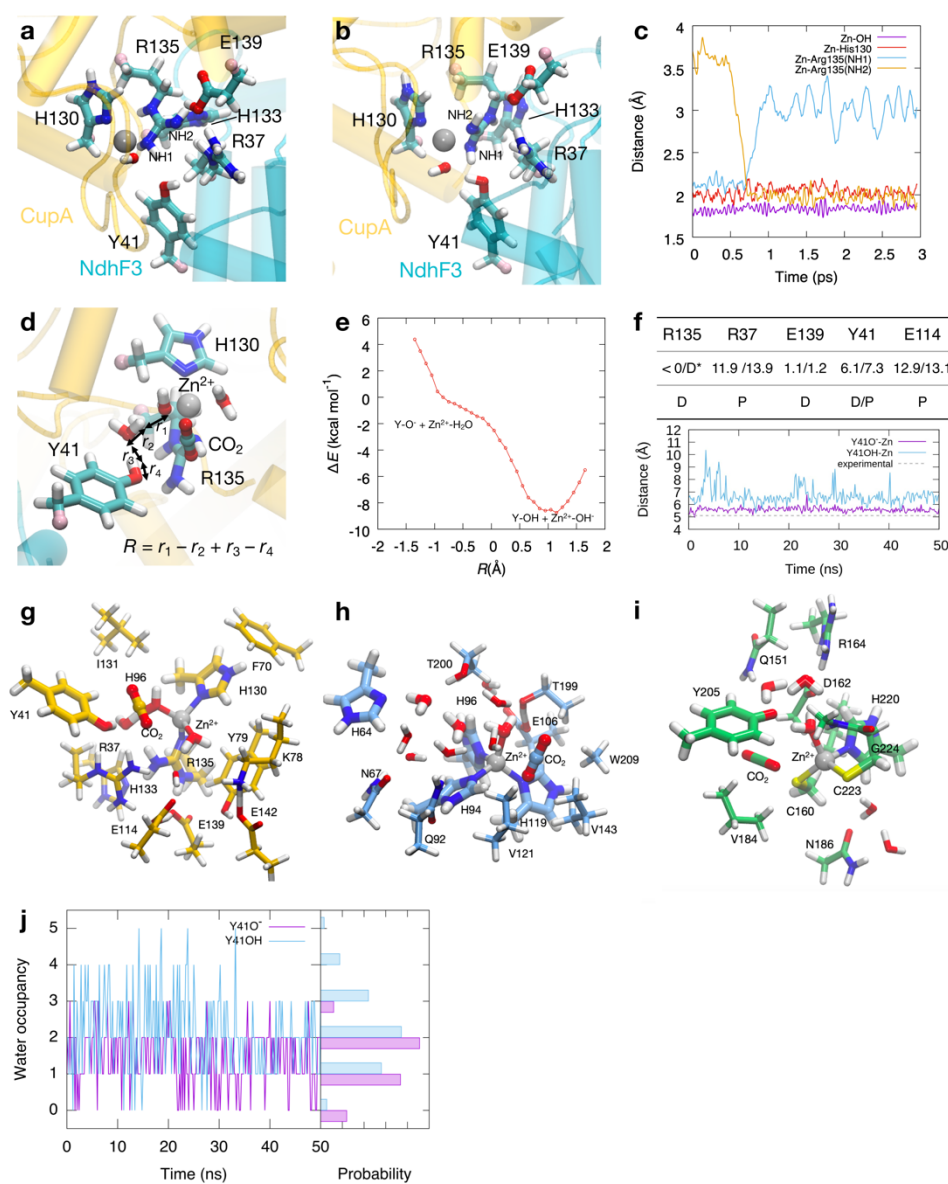

**Supplementary Fig. 5 | QM, QM/MM, and PBE calculations on CupA and CA. a-c)** QM/MM calculations on a CupA/NdhF3 model. **a)** Arg135 (NH2) deprotonates by proton transfer to Glu139. The NH1 group of Arg135 remains coordinated to Zn<sup>2+</sup>. **b)** After *ca.* 1 ps QM/MM MD, the NH2 of Arg135 moves closer to Zn<sup>2+</sup>, further stabilizing the metal centre. **c)** Distance of first coordination sphere ligands to Zn<sup>2+</sup> during the QM/MM MD simulations. **d, e)** QM/MM calculations of the proton transfer reaction from Zn<sup>2+</sup>-H<sub>2</sub>O to Tyr41, showing **d)** the reaction coordinate, *R*, for the pT process and **e)** the pT energetics. **f)** *Top*: Predicted p*K*<sub>a</sub> values of key residues in CupA and the NdhF3 interface during MDFP relaxation obtained from PBE continuum electrostatic models (see Methods). D - deprotonated residue; P - protonated residue; The second set of values correspond to calculations where R135 has been fixed in its deprotonated state (indicated with asterisk). *Bottom*: Distance of protonated Tyr41 (blue) and deprotonated Tyr41 (purple) to Zn<sup>2+</sup> during MD simulations, and in the Cryo-EM structure (dashed grey line). **g-i)** DFT models of CO<sub>2</sub> hydration in CupA and CA. Optimised DFT models of **g)** CupA with *N*=185 atoms, **h)** αCA with *N*=155 atoms, and **i)** βCA with *N*=132 atoms. **j)** Water count between Zn<sup>2+</sup> and Tyr41 during two MD trajectories.

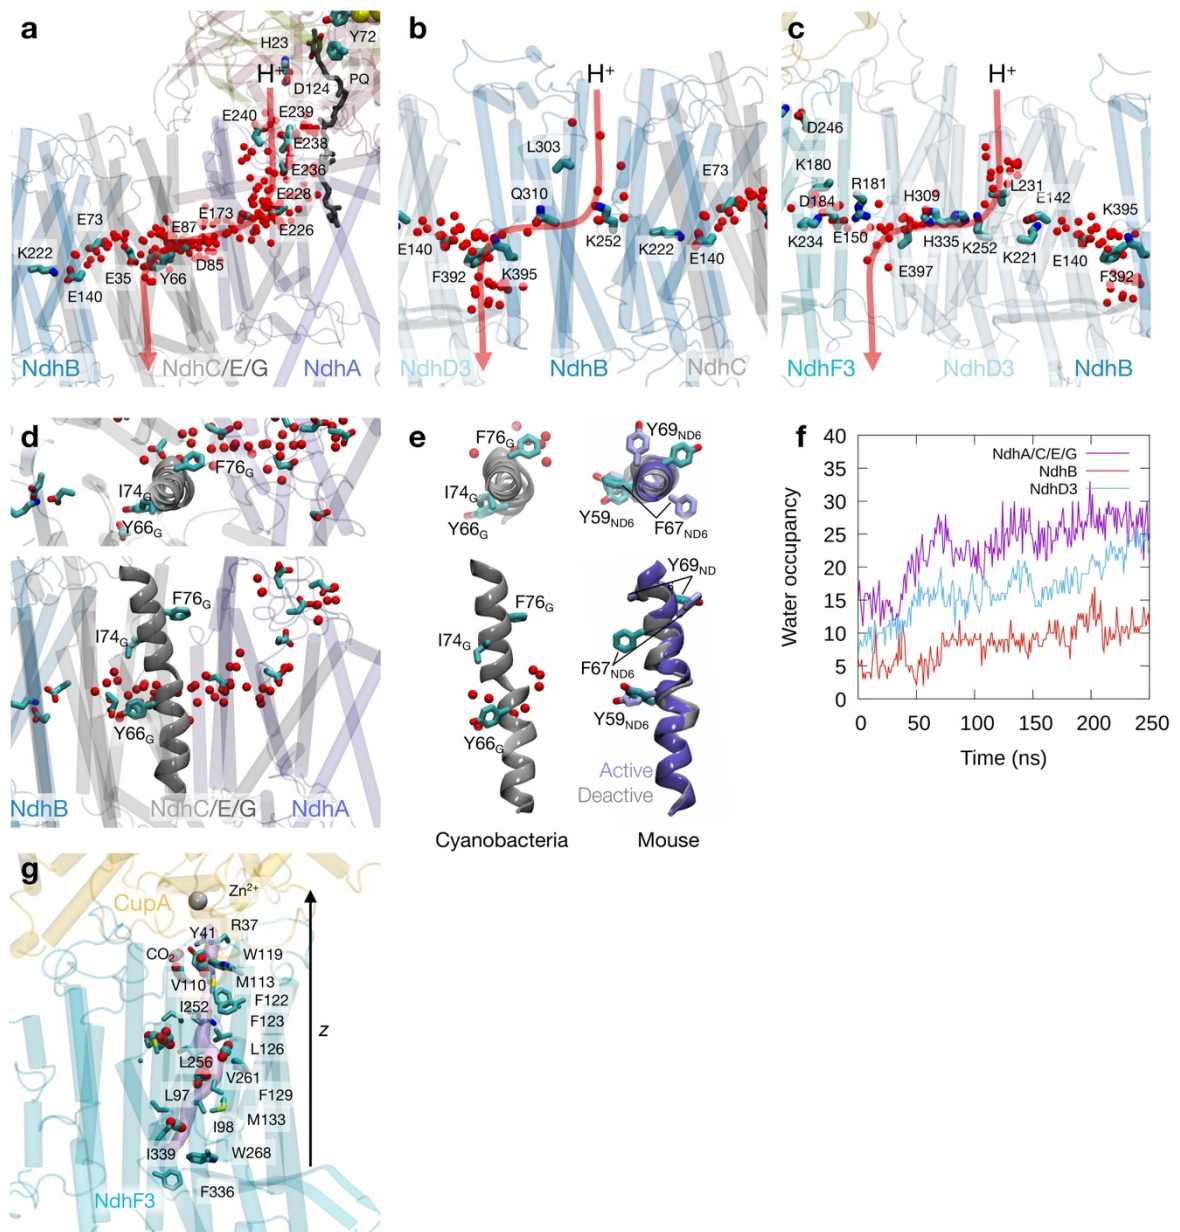

**Supplementary Fig. 6 | Proton and CO<sub>2</sub> channels formed during MD simulation.** The figure shows water molecules (red sphere) averaged over 250 ns MD simulations in **a**) NdhC/E/G, **b**) NdhB, and **c**) NdhD3. **d**) Proton channel in NdhA/E/G and comparison to TM3 rotation in mouse complex I.<sup>10</sup> **e**) TM3 of NdhG in NDH-1MS (grey, left). TM3 helix of ND6 of complex I from *Mus musculus* (right) in the deactive (grey) and active (purple) states. **f**) Hydration dynamics in the putative proton channels in subunits NdhB, NdhD3, and NdhA/C/E/G during MD simulations. **g**) The putative CO<sub>2</sub> gas channel (purple) is surrounded by hydrophobic and bulky residues, and connects to the Zn<sup>2+</sup>-binding site by conserved Tyr41, Arg37 and Glu114 of NdhF3 subunit.

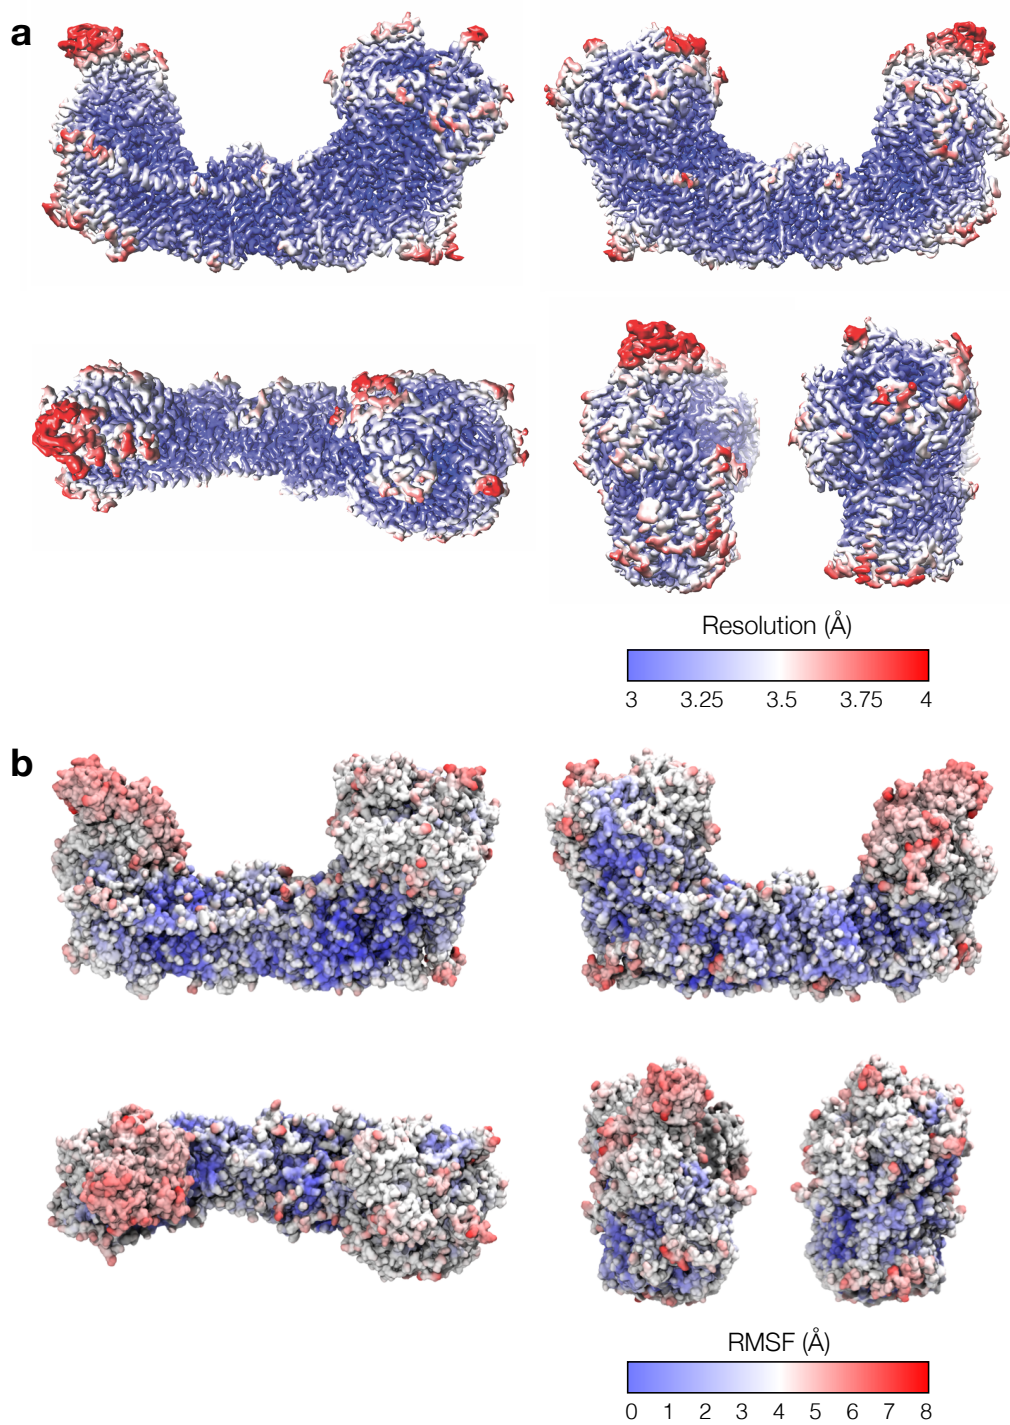

**Supplementary Fig. 7 | Dynamics of NDH-1MS inferred from the local resolution of the cryo-EM map and from MD simulations. a)** The resolution was estimated using the local resolution function in RELION with default parameters and plotted using UCSF Chimera. Units are in (Å). **b)** Root-mean-square-fluctuations (RMSF, in Å) obtained from 250 ns MD simulations of NDH-1MS.



**Supplementary Table 1** | Cryo-EM data collection, refinement and validation statistics.

|                                                  | NDH-1MS<br>(EMDB-10513)<br>(PDB ID: 6TJV) |
|--------------------------------------------------|-------------------------------------------|
| <b>Data collection and processing</b>            |                                           |
| Magnification                                    | 105.000 x                                 |
| Voltage (kV)                                     | 300                                       |
| Electron exposure (e-/Å <sup>2</sup> )           | 40.2                                      |
| Defocus range (µm)                               | 0.5-3.5                                   |
| Pixel size (Å)                                   | 1.35                                      |
| Symmetry imposed                                 | C1                                        |
| Initial particle images (no.)                    | 526.925                                   |
| Final particle images (no.)                      | 170.151                                   |
| Map resolution (Å)                               | 3.20                                      |
| FSC threshold                                    | 0.143                                     |
| Map resolution range (Å)                         | 2.98-7.26                                 |
| <b>Refinement</b>                                |                                           |
| Initial model used (PDB code)                    | 6HUM, <i>de-novo</i>                      |
| Model resolution (Å)                             | 3.23                                      |
| FSC threshold                                    | 0.5                                       |
| Model resolution range (Å)                       | 3.23                                      |
| Map sharpening <i>B</i> factor (Å <sup>2</sup> ) | -89.89                                    |
| Model composition                                |                                           |
| Non-hydrogen atoms                               | 68541                                     |
| Protein residues                                 | 4275                                      |
| Ligands                                          | 15                                        |
| <i>B</i> factors (Å <sup>2</sup> )               |                                           |
| Protein                                          | 60.9                                      |
| Ligand                                           | 64.8                                      |
| R.m.s. deviations                                |                                           |
| Bond lengths (Å)                                 | 0.007                                     |
| Bond angles (°)                                  | 1.109                                     |
| Validation                                       |                                           |
| MolProbity score                                 | 2.2                                       |
| Clashscore                                       | 11                                        |
| Poor rotamers (%)                                | 1.29                                      |
| Ramachandran plot                                |                                           |
| Favored (%)                                      | 88.00                                     |
| Allowed (%)                                      | 11.48                                     |
| Disallowed (%)                                   | 0.52                                      |

**Supplementary Table 2** | Tandem-LC-MS analysis of NDH-1MS. For BN-PAGE, see Supplementary Fig. 2b.

| <b>Subunit<sup>a</sup></b> | <b>ORF</b> | <b>Mass (kDa)<sup>b</sup></b> | <b>TMH<sup>c</sup></b> | <b>XC<sup>d</sup></b> | <b>Coverage<sup>e</sup></b> |
|----------------------------|------------|-------------------------------|------------------------|-----------------------|-----------------------------|
| NdhA                       | tlr0667    | 41.3                          | 8                      | 49.66                 | 18.47                       |
| NdhB                       | tll0045    | 55.1                          | 14                     | 59.88                 | 7.57                        |
| NdhC                       | tlr1429    | 15.0                          | 3                      | 4.67                  | 15.91                       |
| NdhD                       | tlr0905    | 53.8                          | 14                     | 20.74                 | 5.59                        |
| NdhE                       | tlr0670    | 11.1                          | 3                      | 20.05                 | 14.85                       |
| NdhF                       | tlr0904    | 66.2                          | 16                     | 69.12                 | 7.86                        |
| NdhG                       | tlr0669    | 21.6                          | 5                      | 5.35                  | 16.50                       |
| NdhH                       | tlr1288    | 45.2                          | -                      | 302.11                | 49.24                       |
| NdhI                       | tlr0668    | 22.4                          | -                      | 151.24                | 57.14                       |
| NdhJ                       | tlr1430    | 19.3                          | -                      | 142.17                | 59.52                       |
| NdhK                       | tlr0705    | 25.7                          | -                      | 129.30                | 29.11                       |
| NdhL                       | tsr0706    | 8.6                           | 2                      | 5.42                  | 11.84                       |
| NdhM                       | tll0447    | 12.6                          | -                      | 133.40                | 49.55                       |
| NdhN                       | tlr1130    | 16.6                          | -                      | 59.28                 | 55.33                       |
| NdhO                       | tsl0017    | 7.9                           | -                      | 27.22                 | 57.14                       |
| NdhS                       | tlr0636    | 8.2                           | -                      | 18.51                 | 62.16                       |
| NdhV                       | tlr0472    | 13.7                          | -                      | 10.34                 | 19.20                       |
| CupA                       | tlr0906    | 50.9                          | -                      | 268.37                | 49.24                       |
| CupS-TS                    | tll0220    | 18.8                          | -                      | 109.15                | 55.31                       |

<sup>a</sup> results were filtered for known NDH-1MS subunits

<sup>b</sup> calculated molecular weight

<sup>c</sup> number of transmembrane helices

<sup>d</sup> sequest protein score

<sup>e</sup> sequence coverage (percent)

|                                              |                                                                                              |     |
|----------------------------------------------|----------------------------------------------------------------------------------------------|-----|
| <i>T. elongatus</i> (BP-1)/1-437             | 1 MVQAMERPSSAKL PFLDPLADIIYHLEAGGALIPDPVNLMKIIGMYKAVSI PMDFYWRDLYLGERVFINLFFPKYFPTKELFEL     | 88  |
| <i>Synechocystis</i> sp. (PCC 6830)/1-431    | 1 ---MTTLTPKATLPESTHFPADVYHLEAGGSLPDPENLMQIIGIYKAVAVPMDFYWRDLYIAERVFLNLRFFKYFLPQYVLDL        | 85  |
| <i>Synechococcus</i> sp. (PCC 6301)/1-430    | 1 ---MTVTTRTTPLPFSQHRFAEVYHLEAGGSLPDPENLMQIIGIYKAVAVPMDFYWRDLYIAEQVFLNIPAFKYFISQYVLDL        | 85  |
| <i>M. aeruginosa</i> (TAIHU98)/1-431         | 1 ---MTGTLIKAKI PPSHTEFADIHLEAGGSLPDPENLMQIIGIYKAVAVPMDFYWRDLYIAERVFLDLFFKYFLPQYVLDL         | 85  |
| <i>Thermosynechococcus</i> sp. (NK55a)/1-437 | 1 MVQAMERPSSAKL PFLDPLADIIYHLEAGGALIPDPVNLMKIIGMYKAVSI PMDFYWRDLYLGERVFINLFFPKYFPTKELFEL     | 88  |
| <i>S. elongatus</i> (PCC 7942)/1-430         | 1 ---MTVTTRTTPLPFSQHRFAEVYHLEAGGSLPDPENLMQIIGIYKAVAVPMDFYWRDLYIAEQVFLNIPAFKYFISQYVLDL        | 85  |
| <i>S. cyanosphaera</i> (PCC 7437)/1-434      | 1 MVQTPIKQPTAKL PPSHQFADVYHLEAGGSLPDPENLMQIIGIYKAVAVPMDFYWRDLYIAERVFLDLFFKYFLPQYVLDL         | 88  |
| <i>Cyanothece</i> sp. (ATCC 51142)/1-433     | 1 MVQTPIK-PTGII PPSNHQFAEVYHLEAGGSLPDPENLMQIIGIYKAVAVPMDFYWRDLYIAERVFLDLFFKYFLPQYVLDL        | 87  |
| <i>Xenococcus</i> sp. (PCC 7305)/1-433       | 1 MVQT-SPKSTSKI PPSHTEFADIHLEAGGSLPDPENLMQIIGIYKAVAVPMDFYWRDLYIAERVFLDLFFKYFLPQYVLDL         | 87  |
| <i>Nostoc</i> sp. (PCC 7524)/1-440           | 1 MVQ-TPDKPVTKI PPSQHEFADIYHLEAGGSLPDPENLMQIIGIYKAVAVPMDFYWRDLYIAEQVFLNIFGFFKYFISKEVLER      | 87  |
| <i>T. elongatus</i> (BP-1)/1-437             | 89 PHHYAGDTADLRIWRGPAHAHPELMEFIEIKGET-GKMPRLHHLWDRINMEFSEDLARAMMWHRM---GGQLDIYLDSEYKAAAD     | 171 |
| <i>Synechocystis</i> sp. (PCC 6830)/1-431    | 86 ANHYAGETADLRIWRGEASAHPELLEFMEKGNIT-TKMPKLFHHLWDRINMEFAEACQAMLWHGRDM-GMGKFDYLDSEYKANAD     | 171 |
| <i>Synechococcus</i> sp. (PCC 6301)/1-430    | 86 PHSYAGDNADLRIWRGPATAHPELLEFMQKRGELKRLKPKLHHLWDRINMEFAEACMDAMLWHQGM---GGRFNDYLDSEYRQAD     | 170 |
| <i>M. aeruginosa</i> (TAIHU98)/1-431         | 86 QHHYAGDNADLRIWRGTGSAHPELLEFMDKGGT-RKMPRLHHLWDRINMEFAEACQAMLWHGRDM-GWGLFDAYLDSEYRQAD       | 171 |
| <i>Thermosynechococcus</i> sp. (NK55a)/1-437 | 89 PHHYAGDTADLRIWRGPAHAHPELMEFIEIKGET-GKMPRLHHLWDRINMEFSEDLARAMMWHRM---GGQLDIYLDSEYKAAAD     | 171 |
| <i>S. elongatus</i> (PCC 7942)/1-430         | 86 PHSYAGDNADLRIWRGPAHAHPELLEFMQKRGELKRLKPKLHHLWDRINMEFAEACMDAMLWHQGM---GGRFNDYLDSEYRQAD     | 170 |
| <i>S. cyanosphaera</i> (PCC 7437)/1-434      | 89 HHHYAGDDADLRIWRGEATAHPELLEFMEKGGT-TKMPKLFHHLWDRINMEFAEACMDAMLWHGRDM-GWGKFDALDTEYKANAD     | 174 |
| <i>Cyanothece</i> sp. (ATCC 51142)/1-433     | 88 HHHYAGDDADLRIWRGEATAHPELLEFMEKGGT-GKPKLFHHLWDRINMEFAEACMDAMLWHGRDM-GWGKFDALDSEYKANAD      | 173 |
| <i>Xenococcus</i> sp. (PCC 7305)/1-433       | 88 PHHYAGENADLQVWRGRASAHPELLEFMEKGGT-SKMPKLFHHLWDRINMEFAEACMDAMLWHGRDM-GWGKFDALDTEYKANAD     | 173 |
| <i>Nostoc</i> sp. (PCC 7524)/1-440           | 88 HHHYAGDDADLRIWRGEATAHPELLEFMEKGGT-FKPKLFHHLWDRINMEFAEACMDAMLWHGRDM-HRMYAVPNQFDALDSEYKANAD | 174 |
| <i>T. elongatus</i> (BP-1)/1-437             | 172 KAIRAYFKRNPMLGLYKLFDFLFCARQATMMNVLGLFEWVMAVVFPEISDRYDEGSITSVKDAMNVLVNGIFAIAGSPIYHHVYI    | 259 |
| <i>Synechocystis</i> sp. (PCC 6830)/1-431    | 172 KAIRAYFKRNPMLGLYKLFDFLFCARQATMMNVLGLFEWVMAVVFPEISDRYDEGSITSVKDAMNVLVNGIFAIAGSPIYHHVYI    | 259 |
| <i>Synechococcus</i> sp. (PCC 6301)/1-430    | 171 RAIRAYFQGNPMLGLYKLFDFLFCARQATMMNVLGLFEWVMAVVFPEISDRYDEGSITSVKDAMNVLVNGIFAIAGSPIYHHVYI    | 258 |
| <i>M. aeruginosa</i> (TAIHU98)/1-431         | 172 RAIKAYFKRNPMLGLYKLFDFLFCARQATMMNVLGLFEWVMAVVFPEISDRYDEGSITSVKDAMNVLVNGIFAIAGSPIYHHVYI    | 259 |
| <i>Thermosynechococcus</i> sp. (NK55a)/1-437 | 172 KAIRAYFKRNPMLGLYKLFDFLFCARQATMMNVLGLFEWVMAVVFPEISDRYDEGSITSVKDAMNVLVNGIFAIAGSPIYHHVYI    | 259 |
| <i>S. elongatus</i> (PCC 7942)/1-430         | 171 RAIRAYFQGNPMLGLYKLFDFLFCARQATMMNVLGLFEWVMAVVFPEISDRYDEGSITSVKDAMNVLVNGIFAIAGSPIYHHVYI    | 258 |
| <i>S. cyanosphaera</i> (PCC 7437)/1-434      | 175 RAIKAYFKRNPMLGLYKLFDFLFCARQATMMNVLGLFEWVMAVVFPEISDRYDEGSITSVKDAMNVLVNGIFAIAGSPIYHHVYI    | 262 |
| <i>Cyanothece</i> sp. (ATCC 51142)/1-433     | 174 KAIKAYFKRNPMLGLYKLFDFLFCARQATMMNVLGLFEWVMAVVFPEISDRYDEGSITSVKDAMNVLVNGIFAIAGSPIYHHVYI    | 261 |
| <i>Xenococcus</i> sp. (PCC 7305)/1-433       | 174 RAIKAYFKRNPMLGLYKLFDFLFCARQATMMNVLGLFEWVMAVVFPEISDRYDEGSITSVKDAMNVLVNGIFAIAGSPIYHHVYI    | 261 |
| <i>Nostoc</i> sp. (PCC 7524)/1-440           | 175 KAIKAYFQGNPMLGLYKLFDFLFCARQATMMNVLGLFEWVMAVVFPEISDRYDEGSITSVKDAMNVLVNGIFAIAGSPIYHHVYI    | 262 |
| <i>T. elongatus</i> (BP-1)/1-437             | 260 DDEVHVLVPEKKGEMWLYEAAFPYVEAVFYRSPFRGKTSYNAQAKVPEDEKDFHYGILYADVFPVGTAGIPPLLLMQDMYHFLPQY   | 347 |
| <i>Synechocystis</i> sp. (PCC 6830)/1-431    | 260 DGECELIIPKSKGFTWLYEAAFPYVEAVFYRSPFRGKTSYNAQAKVPEDEKDFHYGILYADVFPVGTAGIPPLLLMQDMYHFLPQY   | 347 |
| <i>Synechococcus</i> sp. (PCC 6301)/1-430    | 259 NGECFELIIPKSAGFTWLYEAAFPYVEAVFYRSPFRGKTSYNAQAKVPEDEKDFHYGILYADVFPVGTAGIPPLLLMQDMYHFLPQY  | 346 |
| <i>M. aeruginosa</i> (TAIHU98)/1-431         | 260 DGCYELIIPKSKAFTWLYEAAFPYVEAVFYRSPFRGKTSYNAQAKVPEDEKDFHYGILYADVFPVGTAGIPPLLLMQDMYHFLPQY   | 347 |
| <i>Thermosynechococcus</i> sp. (NK55a)/1-437 | 260 DDEVHVLVPEKKGEMWLYEAAFPYVEAVFYRSPFRGKTSYNAQAKVPEDEKDFHYGILYADVFPVGTAGIPPLLLMQDMYHFLPQY   | 347 |
| <i>S. elongatus</i> (PCC 7942)/1-430         | 259 NGECFELIIPKSAGFTWLYEAAFPYVEAVFYRSPFRGKTSYNAQAKVPEDEKDFHYGILYADVFPVGTAGIPPLLLMQDMYHFLPQY  | 346 |
| <i>S. cyanosphaera</i> (PCC 7437)/1-434      | 263 RGCEYELIIPKSKGFTWLYEAAFPYVEAVFYRSPFRGKTSYNAQAKVPEDEKDFHYGILYADVFPVGTAGIPPLLLMQDMYHFLPQY  | 350 |
| <i>Cyanothece</i> sp. (ATCC 51142)/1-433     | 262 RGCEYELIIPKSKGFTWLYEAAFPYVEAVFYRSPFRGKTSYNAQAKVPEDEKDFHYGILYADVFPVGTAGIPPLLLMQDMYHFLPQY  | 349 |
| <i>Xenococcus</i> sp. (PCC 7305)/1-433       | 262 DDECYELIIPKSKGFTWLYEAAFPYVEAVFYRSPFRGKTSYNAQAKVPEDEKDFHYGILYADVFPVGTAGIPPLLLMQDMYHFLPQY  | 349 |
| <i>Nostoc</i> sp. (PCC 7524)/1-440           | 263 RGCEYELIIPKSKGFTWLYEAAFPYVEAVFYRSPFRGKTSYNAQAKVPEDEKDFHYGILYADVFPVGTAGIPPLLLMQDMYHFLPQY  | 350 |
| <i>T. elongatus</i> (BP-1)/1-437             | 348 LKDYFHQCRGEDDILVQLGIAFHCHAMTYTISAVLQATRAAFYVPLDDPNPKHLKMAHFFEAQMDRFLRFPQYGAIEACKIRNVDPN  | 435 |
| <i>Synechocystis</i> sp. (PCC 6830)/1-431    | 348 LIEYYQKHCRGEDDMLVQLGITFORSMYNVTISAVICALETALLYPLDDPNPKHLKMAHFFEAQMDRFLRFPQYGAIEACKIRNVDPN | 429 |
| <i>Synechococcus</i> sp. (PCC 6301)/1-430    | 347 LLEEYRQHCRGEDDILVQLGITFORSMYNVTISAVICALETALLYPLDDPNPKHLKMAHFFEAQMDRFLRFPQYGAIEACKIRNVDPN | 428 |
| <i>M. aeruginosa</i> (TAIHU98)/1-431         | 348 LIDYQQQCRGEDDILVQLGISTFORSMYNVTISAVICALETALLYPLDDPNPKHLKMAHFFEAQMDRFLRFPQYGAIEACKIRNVDPN | 429 |
| <i>Thermosynechococcus</i> sp. (NK55a)/1-437 | 348 LRDYFHQCRGEDDILVQLGIAFHCHAMTYTISAVLQATRAAFYVPLDDPNPKHLKMAHFFEAQMDRFLRFPQYGAIEACKIRNVDPN  | 435 |
| <i>S. elongatus</i> (PCC 7942)/1-430         | 347 LLEEYRQHCRGEDDMLVQLGITFORSMYNVTISAVICALETALLYPLDDPNPKHLKMAHFFEAQMDRFLRFPQYGAIEACKIRNVDPN | 428 |
| <i>S. cyanosphaera</i> (PCC 7437)/1-434      | 351 LQYQYQHCRGEDDILVQLGITFORSMYNVTISAVICALETALLYPLDDPNPKHLKMAHFFEAQMDRFLRFPQYGAIEACKIRNVDPN  | 432 |
| <i>Cyanothece</i> sp. (ATCC 51142)/1-433     | 350 LIEYYQKHCRGEDDILVQLGITFORSMYNVTISAVICALETALLYPLDDPNPKHLKMAHFFEAQMDRFLRFPQYGAIEACKIRNVDPN | 431 |
| <i>Xenococcus</i> sp. (PCC 7305)/1-433       | 350 LQYQYQHCRGEDDILVQLGITFORSMYNVTISAVICALETALLYPLDDPNPKHLKMAHFFEAQMDRFLRFPQYGAIEACKIRNVDPN  | 431 |
| <i>Nostoc</i> sp. (PCC 7524)/1-440           | 351 LVDDYQYCRGEDDILVQLGITFORSMYNVTISAVICALETALLYPLDDPNPKHLKMAHFFEAQMDRFLRFPQYGAIEACKIRNVDPN  | 438 |
| <i>T. elongatus</i> (BP-1)/1-437             | 436 YL                                                                                       | 437 |
| <i>Synechocystis</i> sp. (PCC 6830)/1-431    | 430 YR                                                                                       | 431 |
| <i>Synechococcus</i> sp. (PCC 6301)/1-430    | 429 YR                                                                                       | 430 |
| <i>M. aeruginosa</i> (TAIHU98)/1-431         | 430 YR                                                                                       | 431 |
| <i>Thermosynechococcus</i> sp. (NK55a)/1-437 | 436 YL                                                                                       | 437 |
| <i>S. elongatus</i> (PCC 7942)/1-430         | 429 YR                                                                                       | 430 |
| <i>S. cyanosphaera</i> (PCC 7437)/1-434      | 433 YR                                                                                       | 434 |
| <i>Cyanothece</i> sp. (ATCC 51142)/1-433     | 432 YR                                                                                       | 433 |
| <i>Xenococcus</i> sp. (PCC 7305)/1-433       | 432 YR                                                                                       | 433 |
| <i>Nostoc</i> sp. (PCC 7524)/1-440           | 439 YR                                                                                       | 440 |

**Supplementary Table 3 |** Multiple sequence alignment (MSA). of the CupA (top) and NdhF (bottom). Colouring conservation threshold: 50%. Colouring method: clustal. Colouring conservation threshold: 90%. The MSAs were performed with ClustalW.<sup>8</sup>

|                                      |                                                                                                   |     |
|--------------------------------------|---------------------------------------------------------------------------------------------------|-----|
| NdhF3 <i>T. elongatus</i> /1-611     | 1 MLQSFADTIVLIPFYSLAGMVLSE----LIWSPGTRKTRGPRPAGY--LNILLTFVSVFHALLATVAIANQ--PPQYLHWTLVDVAGLHLD     | 82  |
| NdhF4 <i>T. elongatus</i> /1-609     | 1 MPNSLLETSSWVPCYGLVGAALT--LWATGYVRRTPRPAAY--FNLLMTVVAFGHGFLLQOTRSG--ATATVHWLQAPGLDLS             | 82  |
| NdhF1 <i>T. elongatus</i> /1-656     | 1 -MEPLYQYAWLIPVLPFLGALVGFGLIAFSETFKLRRRPAIFIM---ALMALIAGHSLTLFWSVQGHLPFT--QMIEMAAAGNLHIA         | 84  |
| NdhF3 <i>Synechocystis</i> sp./1-615 | 1 MLESLSRIIWLVPYVALLGALLA----VWSPGLTRQTRGPRPAGY--ISTLMTFVAFHLSLLVLIHWQ--PAIDLSFPLHAAADLEIN        | 82  |
| NdhF4 <i>Synechocystis</i> sp./1-634 | 1 MSDFLLQSSWVIFPFYGLIGSILS----LPWSFRILIKQTRGPRPAGY--FNVFMTLVSATHGVALSALWQ--PSEQVIFHMLQVADLDT      | 82  |
| NdhF1 <i>Synechocystis</i> sp./1-681 | 1 -MELLYQLAWLIPVLPFLFAGATVVGILISFNQATNKLRQINAVFII---SCLGAALVMSGALLWDQIQGHASYA-QMIEMASAGSFHIE      | 84  |
| Nqo12 <i>T. thermophilus</i> /1-606  | 1 ----MALLGTILLPLGLFALLGLFGKRMREPLPGVLAASGLV----ASFLLGAGLL-----LGGARFQA---EWL----PCIP             | 64  |
| NuoL <i>E. coli</i> /1-613           | 1 ----MNMLALTIILPLIGVFLFASRGRWSENVAIVGVGSLAALVTAFIGVDF--ANGETYSQPLWNTMMSVGFDFNIG                  | 76  |
| N5_M. musculus/1-607                 | 1 -MNIPTTSIILLI-FILLSPLI-----ISMNSLNKHINFP-----LYTTTSIKFSFIISLPLMLFFHNMEYMITWHVMTMNSMEIK          | 77  |
|                                      |                                                                                                   |     |
| NdhF3 <i>T. elongatus</i> /1-611     | 83 IPVEISILTTTALMILITANLMAQVFAVGMEMDVGWAF--FALLALFEGGMGALVLLDSLFFNVVVLIELITLTYLLI--GLVFNQPLVVTG   | 172 |
| NdhF4 <i>T. elongatus</i> /1-609     | 83 FSLLINSVTTGAMELVTGLSILAQIFALGYLEKDWGMA--FALMGFFEAALSGLAISDS--LLSGLLEMLTSLTYLLI--GFVYAOPLVVKKA  | 172 |
| NdhF1 <i>T. elongatus</i> /1-656     | 85 MGYVIDPLAALMLVITVAVFLVMLVSDGMAHPDGYV--FFAYLSLFGSSMLGLVSPNVLQVYI--FWELVGMCSYLLI--GFWYDRKSAEAA   | 174 |
| NdhF3 <i>Synechocystis</i> sp./1-615 | 83 FDLKISTVNIALLVILITGLNLGAQIYAIYGLERDWGWA--FFSMLMFEAGLCTVLCNSLFFSFFVVLIELITLGTYYLIGVFNQSLVVTG    | 172 |
| NdhF4 <i>Synechocystis</i> sp./1-634 | 83 LAVEISPVSLGALSVVGTISFLVQIFGLCYMEKDWSLAF--FYGLLGFEEAALGCLALSDFLSLYGELLEMLTSLTYLLVGFVWYAKQALVA   | 172 |
| NdhF1 <i>Synechocystis</i> sp./1-681 | 85 MGYVIDHLSALMLVITVAVFLVMLVITDGYMAHPDGYV--FFAYLSLFASSMLGLVSPNVLQVYI--FWELVGMCSYLLI--GFWYDRKSAEAA | 174 |
| Nqo12 <i>T. thermophilus</i> /1-606  | 65 FSLLLDNLDSGFMILLVTVGVGFLIHVYAIYMGDPDGYSS--FFAYFNLFIAMMLTLVLADSYPMVLTGVEGVLGASFLYIGFHWKPKQYADS  | 154 |
| NuoL <i>E. coli</i> /1-613           | 77 FNLVLDGLSLTMSLVTGVLFIHMVYASWVRGEGEYS--FFAYTNLFIASMVLVLDLNLMLLWLGVEGVLGCSYLLI--GFVYTDPRNGAA     | 166 |
| N5_M. musculus/1-607                 | 78 MSFKTDFPSLFTSVALFVWISIQFSSV--MHSBPIN--FKYLTLELITMLLITSAANNMFLQITGVEGVLGMSFLIIGWYGRTDANTA       | 167 |
|                                      |                                                                                                   |     |
| NdhF3 <i>T. elongatus</i> /1-611     | 173 ARDAFLTKRFGDILLMGVLAITYPLAGSWNYYDAAWAATAQV---NSTLITLICALIAGPCKCA--FPHLHWLDEAMEGPIEASIL--      | 257 |
| NdhF4 <i>T. elongatus</i> /1-609     | 173 ARDAFLTKRFGDILLMGVVALGSLAGSYDFPHLYEWAQANL---PDGWFLLGLALIAAGPTKCA--FPHLHWLDEAMEGPNPASIM--      | 257 |
| NdhF1 <i>T. elongatus</i> /1-656     | 175 AQKAFVTVNFGDIFGLLGMVGLFWATGDFDFPAGMGLTELVTNGLLSPSLAAILAIVLFLGPVAKSAA--FPHLHWLDEAMEGPIEASIL    | 257 |
| NdhF3 <i>Synechocystis</i> sp./1-615 | 173 ARDAFLTKRFGDILLMGVVALPLAGSWNYYDAAWAASADL---NPTAATLLCLALIAAGPTKCA--FPHLHWLDEAMEGPIEASIL        | 264 |
| NdhF4 <i>Synechocystis</i> sp./1-634 | 173 ARDAFLTKRFGDILLMGVVALSSYQGLTFPSQLDNWASTVPP---TGITATLLGLSLIAGPTKCA--FPHLHWLDEAMEGPNPAGIM--     | 257 |
| NdhF1 <i>Synechocystis</i> sp./1-681 | 175 CQKAFVTVNFGDIFGLLGLLGLYATGSPDFGTIGRLEGLVSSGVLGSAIAAILAIVLFLGPVAKSAA--FPHLHWLDEAMEGPIEASIL     | 264 |
| Nqo12 <i>T. thermophilus</i> /1-606  | 155 ARKAFIVNRIICDGLGFMGLMALLWALYGTLSISELKEAMEGPLK-N---PDLLALAGLLFLGAVGKSAIIPMHWLDEAMEGPIEASIL     | 240 |
| NuoL <i>E. coli</i> /1-613           | 167 AMKAFVTVNFGDIFLAPALFILYNEGLTFNPREMVLVLAFAHFDG---NNMLMWTMLLGLGAVGKSAIIPMHWLDEAMEGPIEASIL       | 253 |
| N5_M. musculus/1-607                 | 168 ALQAILNYRIGDIFGLIAMWESLNMSWELQ---IMFSNNN---DNL--IPLMGLLIAATKCA--FPHLHWLDEAMEGPIEASIL          | 247 |
|                                      |                                                                                                   |     |
| NdhF3 <i>T. elongatus</i> /1-611     | 258 RNAVVVATGAWLVKLPVLSLSPVALTALVLSV--ALGTLIATAV--DTRKALSIVLSAYMGVPIAVGLKPEGLIAVFLVILTYSLAMA      | 347 |
| NdhF4 <i>T. elongatus</i> /1-609     | 258 RNSVVVAAAGAYILIKLOPLVACPGANIALIAITV--AISELSVSIAG--IDIKRALSHTSVYLVLFVIGVGNWDFALFVLLTHAIAKA     | 347 |
| NdhF1 <i>T. elongatus</i> /1-656     | 265 HAATMVAAGVFLIARMPFVFEQLQVMTTIAWTGAF--AFMGATIAIT--NDIKRSLAYSTISQLGYMVMGCVGAYSAGLPHLMTTHAYFKA   | 354 |
| NdhF3 <i>Synechocystis</i> sp./1-615 | 258 RNTLVVATGAWLVKLPVLSLSPVALTALVLSV--AIGASLIAIAI--DTRKFLSYVVSAYMGLVPIAVTGGQGETALQLIFTYTFAMA      | 347 |
| NdhF4 <i>Synechocystis</i> sp./1-634 | 258 RNSVVVSAAGAYVLIKLOPLVETLSIASKTLVILVTL--VVMVMSLIAIAI--DTRKSLSHSTSVYLVLFVAVGLGQVDFLFLPAHAIAKA   | 347 |
| NdhF1 <i>Synechocystis</i> sp./1-681 | 265 HAATMVAAGVFLVARMYPVEFPIPVVMTTIAFTGCT--AFGLATIAIT--NDIKRSLAYSTISQLGYMVMAMGIGAYSAGLPHLMTTHAYFKA | 354 |
| Nqo12 <i>T. thermophilus</i> /1-606  | 241 HAATMVTAGVYLIARSSFLVSLPDSVYLAIVAVGLL--IAYGALSFAFG--DTRKIVAYSTISQLGYMFLAAGVAYVWVFLPHMTTHAFFKA  | 330 |
| NuoL <i>E. coli</i> /1-613           | 254 HAATMVTAGVYLIARTHGLFVPEVHLVILVAVGLL--IAGPAALV--DTRKSLAYSTISQLGYMFLAAGVAYVWVFLPHMTTHAFFKA      | 340 |
| N5_M. musculus/1-607                 | 248 HSSTMVAGIFLLVRFHPLTNNNFILTTMLCLGAI--TLFTAICALT--DTRKIVAYSTISQLGIMMVTLENNQPHLAFHICHTAFFKA      | 337 |
|                                      |                                                                                                   |     |
| NdhF3 <i>T. elongatus</i> /1-611     | 348 VLMMSIGSITWNSVT-----DRLRLGLWSRR--ISGISFLVGSAGLLAVPPL--ASFFPQAEELDTAFAG---LPWVGGVLLMNT         | 424 |
| NdhF4 <i>T. elongatus</i> /1-609     | 348 LLMFMSIGSIVMTNS-----DLTEGLGGERMATSFAVIGGLSLI--GLPL--GAFWSFYRGIYYWQT---MPWLVGLIIVNL            | 424 |
| NdhF1 <i>T. elongatus</i> /1-656     | 355 MLFLGSGSVIHSMEGVVGHNDPLA--DMRYMGLRKYM--ITGATFLVGLCLAISGVPPF--AGFWSKDEILGAVFHA---NPAMWLLTWLTA  | 420 |
| NdhF3 <i>Synechocystis</i> sp./1-615 | 348 IIVMCGVGIILNNTV-----DLITQYGLWSRR--ISGLSYLVGVASLIALPPF--GTFWAWLKAENLATS---SPLLVGLVLLVNL        | 424 |
| NdhF4 <i>Synechocystis</i> sp./1-634 | 348 LLMFMSIGSITFTSG-----NITMETLNNRMEVTTTSFVVSAGLLAVPPL--GMFTVWVWVMSGLVAV---SWPILLALLVNL           | 424 |
| NdhF1 <i>Synechocystis</i> sp./1-681 | 355 MLFLCSGSVIHSMEGVVGHNDPILA--DMRIMGRLKYM--ITATCFLIGTLATC--IIPP--AGFWSKDEILGALFQA---NPLLWFVWATAG | 440 |
| Nqo12 <i>T. thermophilus</i> /1-606  | 331 LLFLASGSVIALHGG-----DVRMKGGLWKHL--PTRWHALIGALAGLPL--SGFWSKDAI LAATLTYPGVGGVYVAGLLVAV          | 411 |
| NuoL <i>E. coli</i> /1-613           | 344 LLFLASGSVILACHH-----ENIFKMGGLRKSILVLYVCLVGGAAISALPLVTAAGFWSKDEILGAGMA---NGHINMLVAVAGLVAF      | 423 |
| N5_M. musculus/1-607                 | 338 MLFMCSSITHSLAD-----DDIRKMENTKIM--FTSSCLVIGSLAIT--GMPFL--TGFSKDLI--EAINTC--NTNAWALLITLIATS     | 417 |
|                                      |                                                                                                   |     |
| NdhF3 <i>T. elongatus</i> /1-611     | 425 FAAFSLG--TEFLVWVGGEVKPMTA-----RSPEVFWPMILPMTVDLGLVHLPLPMA                                     | 475 |
| NdhF4 <i>T. elongatus</i> /1-609     | 425 LTAVNLT--VFRVFLGPAQPKTR-----RAPEVTFPLAVPMVTLISLMLVFPFLLQ                                      | 475 |
| NdhF1 <i>T. elongatus</i> /1-656     | 441 LTAFYMF--MYFMTFEGKFRNVPPEQE-----HHHSHHAAVPHESPWTMLPLVLAIPSTLIGFVGT                            | 505 |
| NdhF3 <i>Synechocystis</i> sp./1-615 | 425 LTAFNVT--GFCLIFGGEAKPMTV-----RSPGELWALVPMVTVGFALHLSLILK                                       | 475 |
| NdhF4 <i>Synechocystis</i> sp./1-634 | 425 FSALNLT--VFRVFLVFLGPKPQKTR-----RAPEVWPWMAVPMVSLIIVTLVPIAPL                                    | 475 |
| NdhF1 <i>Synechocystis</i> sp./1-681 | 441 MTAFYMF--MYFMTFEGGFRNDQAEKDVGLQFYGLLPNFGGAMNPKELDHEAGHDHSHSSEPHESPMTMTFPLMALAVPSVLIGLGR       | 530 |
| Nqo12 <i>T. thermophilus</i> /1-606  | 412 LTMAYM--WFVFLVFLGEEGRH-----H-----HPHEAPPVLMVLLHLLGSLVAGYLAL                                   | 461 |
| NuoL <i>E. coli</i> /1-613           | 424 MTSLYTF--MIFIVFHGKEQIH-----A-----HAVKGVTHSLPIVLLIL--STFVGALLV                                 | 472 |
| N5_M. musculus/1-607                 | 418 MTAMYSM--IIEVFTMTKPRFPPLIS-----INENDPDLNMPKRLAFSGIFAGFVIS                                     | 469 |
|                                      |                                                                                                   |     |
| NdhF3 <i>T. elongatus</i> /1-611     | 476 R-----FDWVIWTPQLSATAAALITALL--LWVAAWVYLGKAIKPKV---QFPLPSVQN-----LLAYDFY                       | 533 |
| NdhF4 <i>T. elongatus</i> /1-609     | 476 R--V-----Q--LLEPTIDWTI---VALVVSGLACILLGGFVTLKRSWTRPI---KVLRFVQD-----LLAYDFY                   | 532 |
| NdhF1 <i>T. elongatus</i> /1-656     | 506 P--FNNLFEVFIHAPGEEKVAEHAVDLTFEL--ILGSSVGI--LGMCTIVAYLMLKGTFPSPQ--AI-----AKAIQP-----LYQFSLHKWY | 581 |
| NdhF3 <i>Synechocystis</i> sp./1-615 | 476 Q--G-NLLPD-----FADINWGL-----SSVLIASSLLVGGSAFYLYLNPKITKPI---DLPLPVQVN-----FFAYDLV              | 534 |
| NdhF4 <i>Synechocystis</i> sp./1-634 | 476 Q--W-SFNLSATYPLG---LTSPTVQWA-----MPLMLVAGITCILLGSLMPLRRNLSRSS---RLRPLVQD-----LFAYDQV          | 541 |
| NdhF1 <i>Synechocystis</i> sp./1-681 | 531 P--WANQFEAFIHPGEVVEHAEFEWGEFY--VMAGNSIGIALIGITVASLMYVQHKFDPK--VL-----AEKFPS---LYQSLINKWY      | 606 |
| Nqo12 <i>T. thermophilus</i> /1-606  | 462 PHPLPNVLEPFLKPALAEVE--AHH-----L-SLGAEWGLIASAAVA--LLGLWAGVFFPQ-----RKVFPA--WYLAFAEASREAFY      | 533 |
| NuoL <i>E. coli</i> /1-613           | 473 P--PLQGVLPQTEP---AH--GSM-----L-TLEITSGVAVVGLL--AAWLWLGKRTLVTSIANSAPRGLLTKWVYNAW-----G         | 540 |
| N5_M. musculus/1-607                 | 470 YNIPPTSIPVLTMP-----W-FLLKTTALIIISVGLFALE---LNNLTMKLSMKNANPYSFST-----LLGF                      | 528 |
|                                      |                                                                                                   |     |
| NdhF3 <i>T. elongatus</i> /1-611     | 534 TPPLYRATV-----VGVVDMISRTAWDFRTFVDGTGNAGVVTLLGGDRLKYSTT--QSQAM--ILTIIMGIAITLVI---AICWPLLA--    | 611 |
| NdhF4 <i>T. elongatus</i> /1-609     | 533 IEELYRYTV-----VWAVRSLQSLSAWVDRHIVDRVNTGAASLVGGLLKYSGASQSQAM--LLLVFVIGLALGG---AIAWALL--        | 609 |
| NdhF1 <i>T. elongatus</i> /1-656     | 582 FDELYEAVF-----IKCCRRLLARQVLEVDVNVVDGVNVLGFTVMTVGTGELKYLQNGRAQFALIVL--IAGVGFVI---PSVQ--T--     | 656 |
| NdhF3 <i>Synechocystis</i> sp./1-615 | 535 TDKFYKLT-----VAVIDSIRLNIWDFKTFVDGVNLIIGIVTIFSGQSLKYNVSQ--QTFVLSIVLGLTLIGA---FLSYSLGQ          | 613 |
| NdhF4 <i>Synechocystis</i> sp./1-634 | 542 LDKIYGATV-----VAAVAATAKISTWFDVYVLDGIVNLVSLVTFSGSALKYVNT--QSQPMLLTLVGVALLIWFSLGQWMAIRQ         | 623 |
| NdhF1 <i>Synechocystis</i> sp./1-681 | 607 FDDLVDKLF-----VQGSRRVARQIMEVDYKVDGAVNLTGLVTLVSGEGLKYLENGRAQFALIVF--GAVLGFVI---VFSL--T--       | 681 |
| Nqo12 <i>T. thermophilus</i> /1-606  | 534 VDRAYNALI-----VNPFLKAAEAALFYGDRLSSYFGL--GGAARSLGQGLARLQTFYLRVVALLTVLGLALLLGV---MRW-----       | 606 |
| NuoL <i>E. coli</i> /1-613           | 541 FDLWLYDKVF-----VKPFLGLAWLL---KRDPLNSMNIIPAVLSRFAGKCLLSENGYLRVWVMSMIGAVVVAL---LMLV--R--        | 613 |
| N5_M. musculus/1-607                 | 529 PPSIIHRTIPMKSLNLSLKTSLTLLDLVLEKTIIPKSTSTL-----HTNMTTITNOKGLIKL--FMSFLINIILIIIL---YSIN--LE     | 607 |
|                                      |                                                                                                   |     |
| NdhF3 <i>T. elongatus</i> /1-611     | -----                                                                                             |     |
| NdhF4 <i>T. elongatus</i> /1-609     | -----                                                                                             |     |
| NdhF1 <i>T. elongatus</i> /1-656     | -----                                                                                             |     |
| NdhF3 <i>Synechocystis</i> sp./1-615 | 614 AF-----                                                                                       | 615 |
| NdhF4 <i>Synechocystis</i> sp./1-634 | 624 FWSSWLSLILP-----                                                                              | 634 |
| NdhF1 <i>Synechocystis</i> sp./1-681 | -----                                                                                             |     |
| Nqo12 <i>T. thermophilus</i> /1-606  | -----                                                                                             |     |
| NuoL <i>E. coli</i> /1-613           | -----                                                                                             |     |
| N5_M. musculus/1-607                 | -----                                                                                             |     |

**Supplementary Table 3 (contd.)** | Multiple sequence alignment (MSA) of the CupA (top) and NdhF (bottom). Colouring conservation threshold: 50%. Colouring method: clustal. Colouring conservation threshold: 90%. The MSAs were performed with ClustalW.<sup>8</sup>

**Supplementary Table 4** | List of primers for the construction of the *T. elongatus* CupS-TwinStrep-tag mutant.

| Primer Name    | DNA Sequence (5' to 3')                                              | Description                                                                                                                                                           | PCR <sup>a</sup>  |
|----------------|----------------------------------------------------------------------|-----------------------------------------------------------------------------------------------------------------------------------------------------------------------|-------------------|
| P1- <i>for</i> | AAAGAGCTCGGCCATAGCCAGAT<br>GTC                                       | <i>cupS</i> ( <i>tll0220</i> ), US region and StrepII-tag incl. 5'-end SacI and 3'-end SacII restriction site, amplified from genomic DNA                             | 1,975             |
| P2- <i>rev</i> | GGGCCGCGGTTATTTTCGAACTG<br>CGGGTGGCTCCAAGCGCTGACTTT<br>GTAGGGAATGTTG |                                                                                                                                                                       |                   |
| P3- <i>for</i> | GGGCTGCAGGGTATTAGCAGATTT<br>CCC                                      | <i>cupS</i> ( <i>tll0220</i> ) and DS region incl. 5'-end PstI and 3'-end KpnI restriction site, amplified from genomic DNA                                           | 1,512             |
| P4- <i>rev</i> | CCCGGTACCCAATCAGGTCGTAGT<br>TGC                                      |                                                                                                                                                                       |                   |
| P5- <i>rev</i> | GCAGAACCACCAGAACCACCGCCG<br>CTGCCGCGCCTTTTCGAACTGCG<br>GGTGGC        | <i>cupS</i> ( <i>tll0220</i> ), US region and 1/2 TS-tag incl. 5'-end SacI and 3'-end SacII restriction site, amplified from pCupS-StrepII-tag (with P1- <i>for</i> ) | 1,998             |
| P6- <i>rev</i> | CCCGCGGCCGCTTACTTCTCAAATT<br>GCGGATGAGACCACGCAGAACCAC<br>CAGAACCACC  | <i>cupS</i> ( <i>tll0220</i> ), US region and TS-tag incl. 3'-end NotI restriction site, amplified from product P1/P5 (with P1- <i>for</i> )                          | 2,037             |
| P7- <i>for</i> | GGATTAACGGACGCGATTAC                                                 | Segregation check                                                                                                                                                     | 2,148<br>(WT 842) |
| P8- <i>rev</i> | AGGCCGATAAGGCAGAACTA                                                 |                                                                                                                                                                       |                   |

<sup>a</sup> PCR product length in basepair, US = Upstream, DS = Downstream

### Supplementary References

- Iwai M., Katoh H., Katayama M. & Ikeuchi M. Improved genetic transformation of the thermophilic cyanobacterium, *Thermosynechococcus elongatus* BP-1. *Plant Cell Physiol.* **45**, 171–175 (2004).
- Yamaoka, T. Satoh, K. & Katoh S. Photosynthetic activities of a thermophilic blue-green alga. *Plant Cell Physiol.*, **19**, 943–954 (1978).
- Rippka, R., Deruelles, J., Waterbury, J. B., Herdman, M. & Stanier, R. Y. Generic Assignments, Strain Histories and Properties of Pure Cultures of Cyanobacteria. *Microbiology* **111**, 1–61 (1979).
- Schuller, J. M. *et al.* Structural adaptations of photosynthetic complex I enable ferredoxin-dependent electron transfer. *Science*, **363**, 257–260 (2019).
- Wulforth, H., Franken, L. E., Wessinghage, T., Boekema, E. J. & Nowaczyk, M. M. The 5 kDa protein NdhP is essential for stable NDH-1L assembly in *Thermosynechococcus elongatus*. *PLoS One* **9**, e103584 (2014).
- Kuhl, H. *et al.* Towards Structural Determination of the Water-splitting Enzyme. *J. Biol. Chem.* **275**, 20652–20659 (2000).
- Sinclair, S.A., Larue, C., Bonk, L., Khan, A., Castillo-Michel, H., Stein, R.J., Grolimund, D., Begerow, D., Neumann, U., Haydon, M.J., Krämer, U. Etiolated Seedling Development Requires Repression of Photomorphogenesis by a Small Cell-Wall-Derived Dark Signal *Curr Biol.* **27**, 3403–3418 (2017).
- Sievers, F. *et al.* Fast, scalable generation of high-quality protein multiple sequence alignments using Clustal Omega. *Mol. Syst. Biol.* **7**, 1–6 (2011).
- Korste, A., Wulforth, H., Ikegami, T., Nowaczyk, M.M. & Stoll, R. Solution structure of the NDH-1 complex subunit CupS from *Thermosynechococcus elongatus*. *Biochim. Biophys. Acta - Bioenerg.* **1847**, 1212–1219 (2015).
- Agip, A. N. A. *et al.* Cryo-EM structures of complex I from mouse heart mitochondria in two biochemically defined states. *Nat. Struct. Mol. Biol.* **25**, 1–9 (2018).
