# Supplementary material for: Redox-coupled proton pumping drives carbon concentration in the photosynthetic complex I
Source: PubMed Central journal article supplement (PMC6981117; doi:10.1038/s41467-020-14347-4), 2020-01-24
Supplement: 41467_2020_14347_MOESM3_ESM.pdf [file 41467_2020_14347_MOESM3_ESM.pdf]

**Title:** Supplementary Movie 1

**Description:** Architecture of the CO<sub>2</sub>-concentrating photosynthetic complex I
